# Supplementary material for: Negentropy anomaly analysis of the borehole strain associated with the Ms 8.0 Wenchuan earthquake
Source: Copernicus journal article supplement (doi:10.5194/npg-2019-22), 2019-05-14
Supplement: Supplementary file [file npg-2019-22-RC3-supplement.pdf]

Comments by Referee#1 concerning NPG submission:

npg-2019-22

Title: Negentropy anomaly analysis of the borehole strain associated with the Ms 8.0 Wenchuan earthquake

Author(s): Kaiguang Zhu et al.

General Comments:

All the Authors' corrections and replies are in the right direction.

- Probably there is a misunderstanding concerning my first comment. I did not propose a whole new paragraph about the “Negentropy” notion but about the “borehole strain” method !

However it has been a good idea to add a new paragraph about the “Negentropy” notion !

- The NPG paper by Karamanos et al. (NPG, 2005) mainly uses the “block-entropy analysis by lumping” of symbolic sequences, formally introduced in the literature in:

“Entropy analysis of substitutive sequences revisited.”

K. Karamanos

J. Phys. A: Math. Gen. 34, 9231-9241 (2001).

- The Phys. Rev. E paper by Karamanos et al. (Phys. Rev. E, 2006) mainly uses the “T-complexity” notion to preseismic precursors for the first time in the international literature of Geophysics.

- The notion of the approximate Entropy (ApEn) is mainly used in:

“A unified approach of catastrophic events.”

S. Nikolopoulos, P. Kapiris, K. Karamanos and K. Eftaxias

Nat. Haz. Earth Syst. Sciences 4, 615-631 (2004).

Of course, I leave to the discretion of the Editor and the Authors to add or not the above mentioned References.

I have no further comments.
